# Supplementary material for: Performance of Impedance Control-Based Strategies in Power-Assisted Wheelchairs: A Predictive Simulation Study
Source: Frontiers journal article supplement (doi:10.3389/fnbot.2022.805835), 2022-03-04
Supplement: Data_Sheet_1.PDF [file Data_Sheet_1.PDF]

## Supplementary Material

### 1 FIGURES

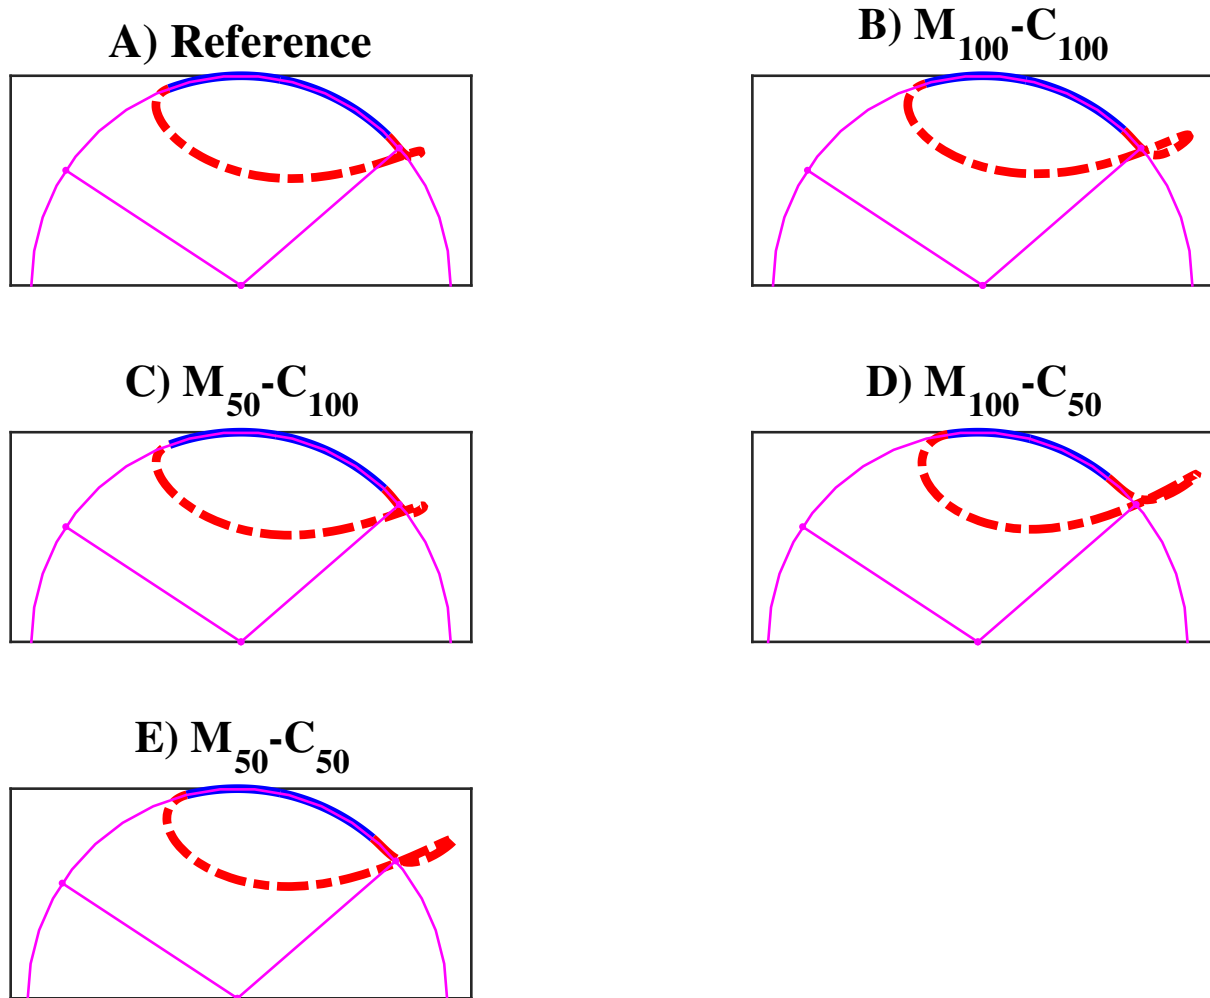

**Figure S1.** Predicted hand patterns for the reference unassisted condition (Reference) (A), for the assisted locomotion with 100% of reference model parameters  $M_i$  and  $C_i$  ( $M_{100} - C_{100}$ ) (B), reduction of 50% in  $M_i$  ( $M_{50} - C_{100}$ ) (C), reduction of 50% in  $C_i$  ( $M_{100} - C_{50}$ ) (D), and reduction of 50% in  $M_i$  and  $C_i$  ( $M_{50} - C_{50}$ ) (E) along a complete cycle for *steady state* locomotion on a level surface at an average speed of 0.9 m/s.

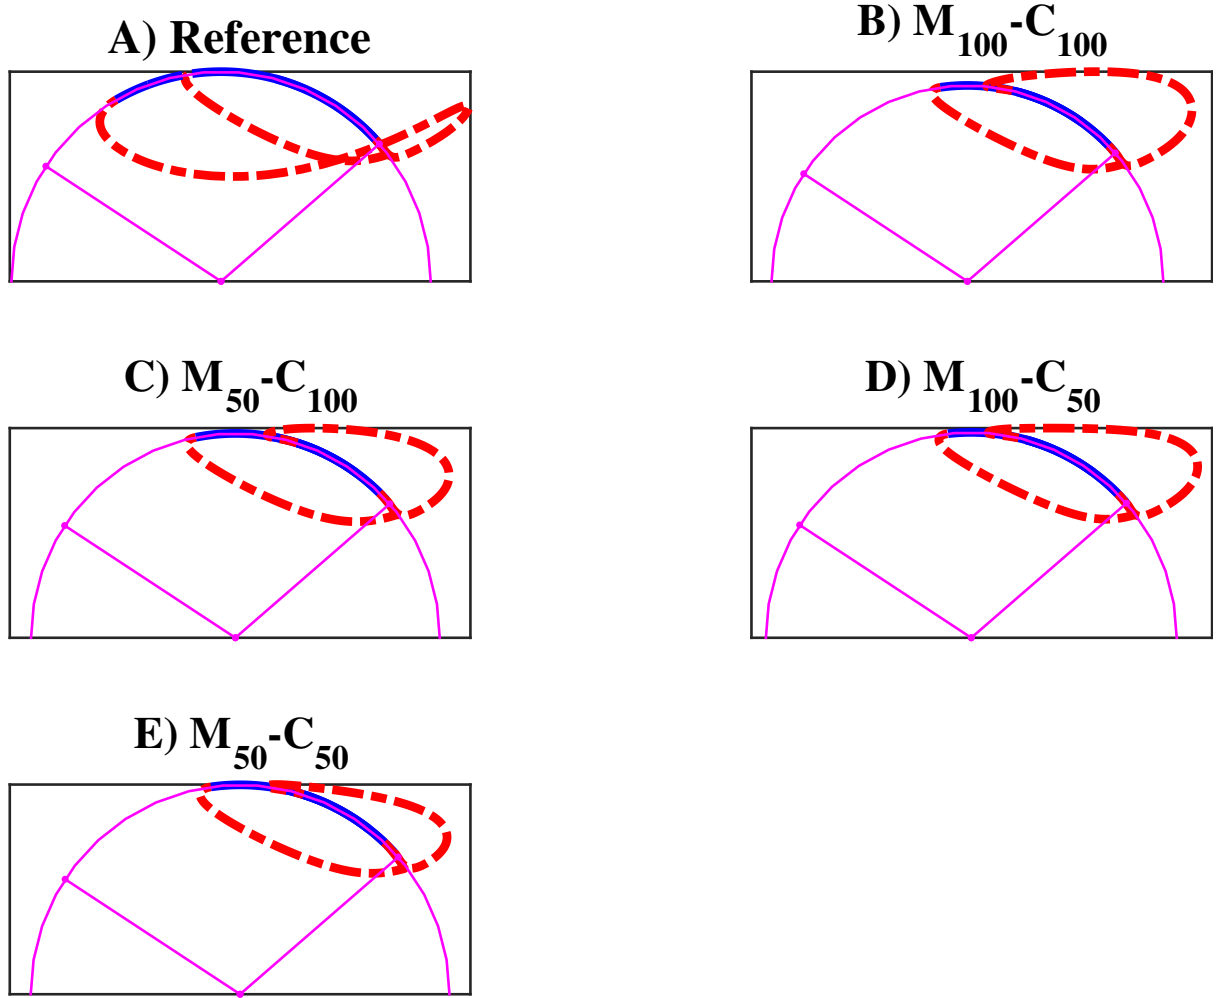

**Figure S2.** Predicted hand patterns for the reference unassisted condition (Reference) (A), for the assisted locomotion with 100% of reference model parameters  $M_i$  and  $C_i$  ( $M_{100} - C_{100}$ ) (B), reduction of 50% in  $M_i$  ( $M_{50} - C_{100}$ ) (C), reduction of 50% in  $C_i$  ( $M_{100} - C_{50}$ ) (D), and reduction of 50% in  $M_i$  and  $C_i$  ( $M_{50} - C_{50}$ ) (E) along the sequence of phases propulsion-recovery-propulsion-recovery-propulsion in the *startup* locomotion on a level surface at an average speed of 0.9 m/s.

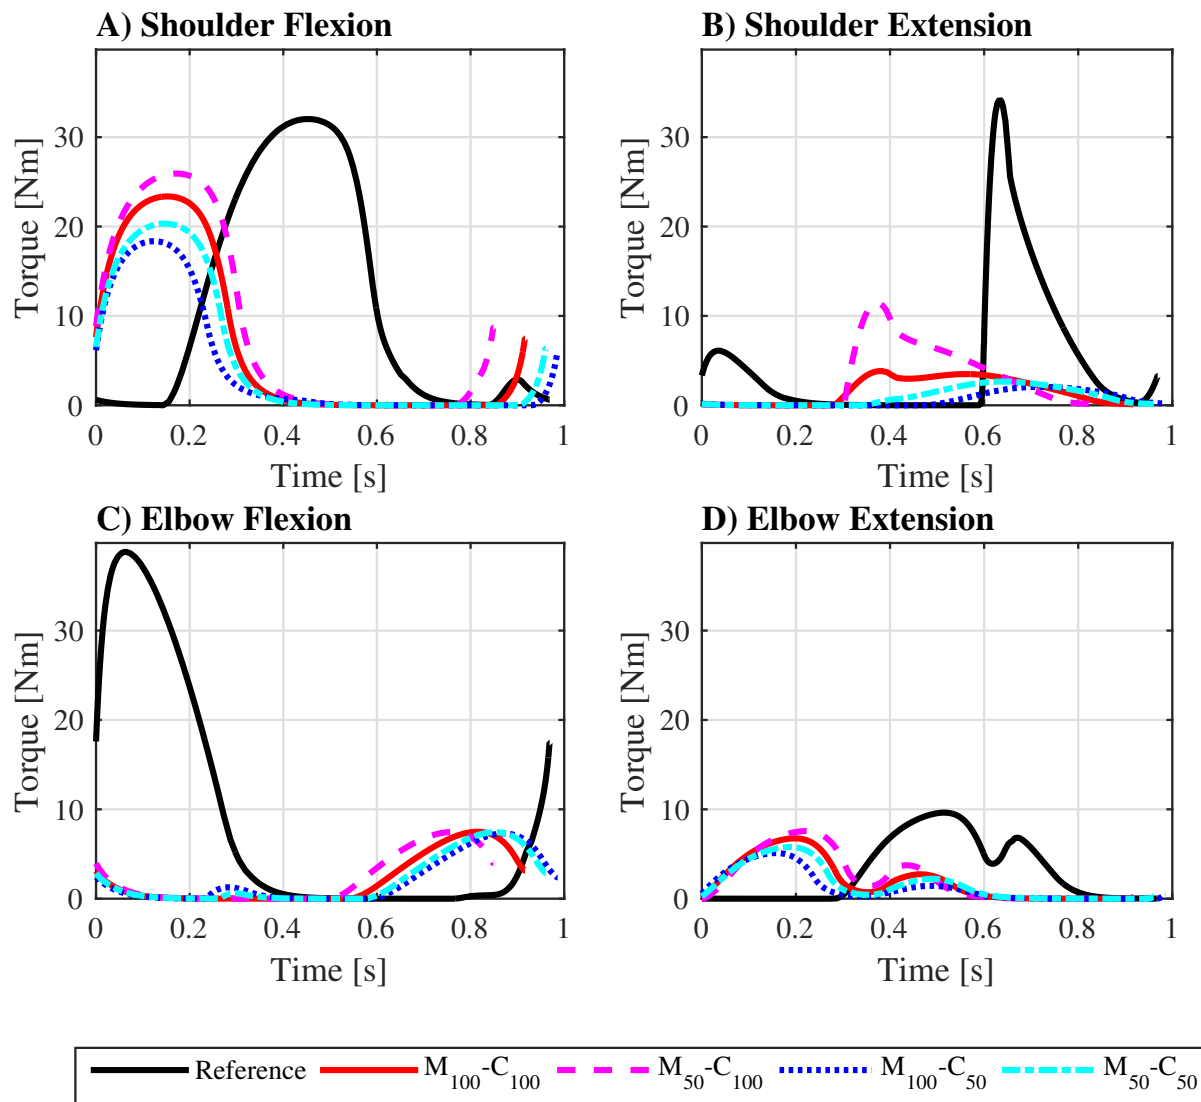

**Figure S3.** Predicted bilateral shoulder flexion (A), shoulder extension (B), elbow flexion (C) and elbow extension (D) torque profiles along a complete cycle for *steady state* locomotion on a 3° ramp at an average speed of 0.9 m/s for the reference unassisted condition (Reference), and for the assisted locomotion with 100% of reference model parameters  $M_i$  and  $C_i$  ( $M_{100} - C_{100}$ ), reduction of 50% in  $M_i$  ( $M_{50} - C_{100}$ ), reduction of 50% in  $C_i$  ( $M_{100} - C_{50}$ ), and reduction of 50% in  $M_i$  and  $C_i$  ( $M_{50} - C_{50}$ ).

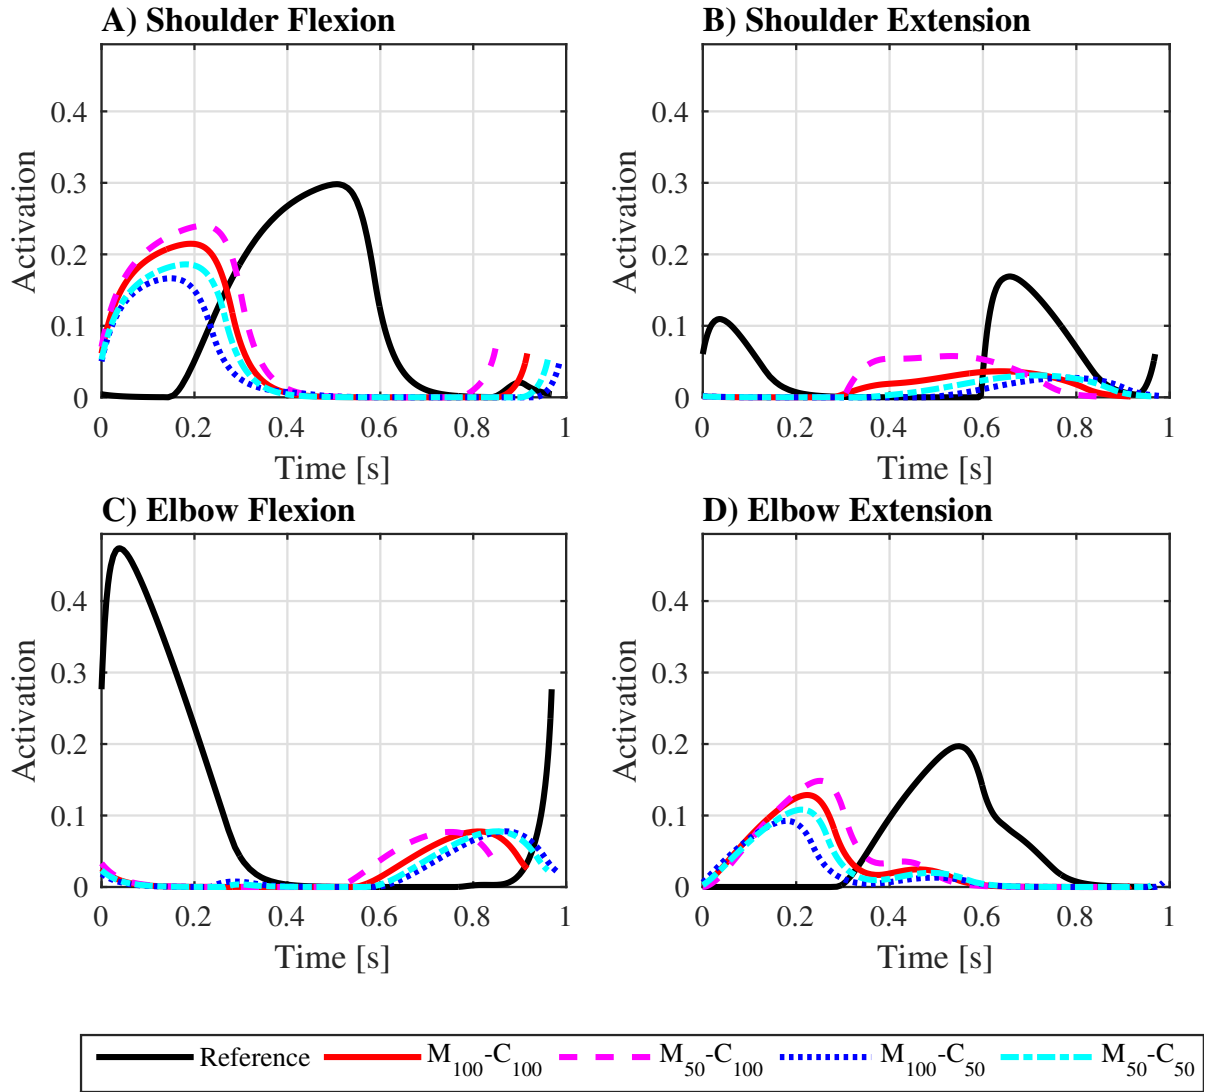

**Figure S4.** Predicted bilateral shoulder flexion (A), shoulder extension (B), elbow flexion (C) and elbow extension (D) activation profiles along a complete cycle for *steady state* locomotion on a 3° ramp at an average speed of 0.9 m/s for the reference unassisted condition (Reference), and for the assisted locomotion with 100% of reference model parameters  $M_i$  and  $C_i$  ( $M_{100}-C_{100}$ ), reduction of 50% in  $M_i$  ( $M_{50}-C_{100}$ ), reduction of 50% in  $C_i$  ( $M_{100}-C_{50}$ ), and reduction of 50% in  $M_i$  and  $C_i$  ( $M_{50}-C_{50}$ ).

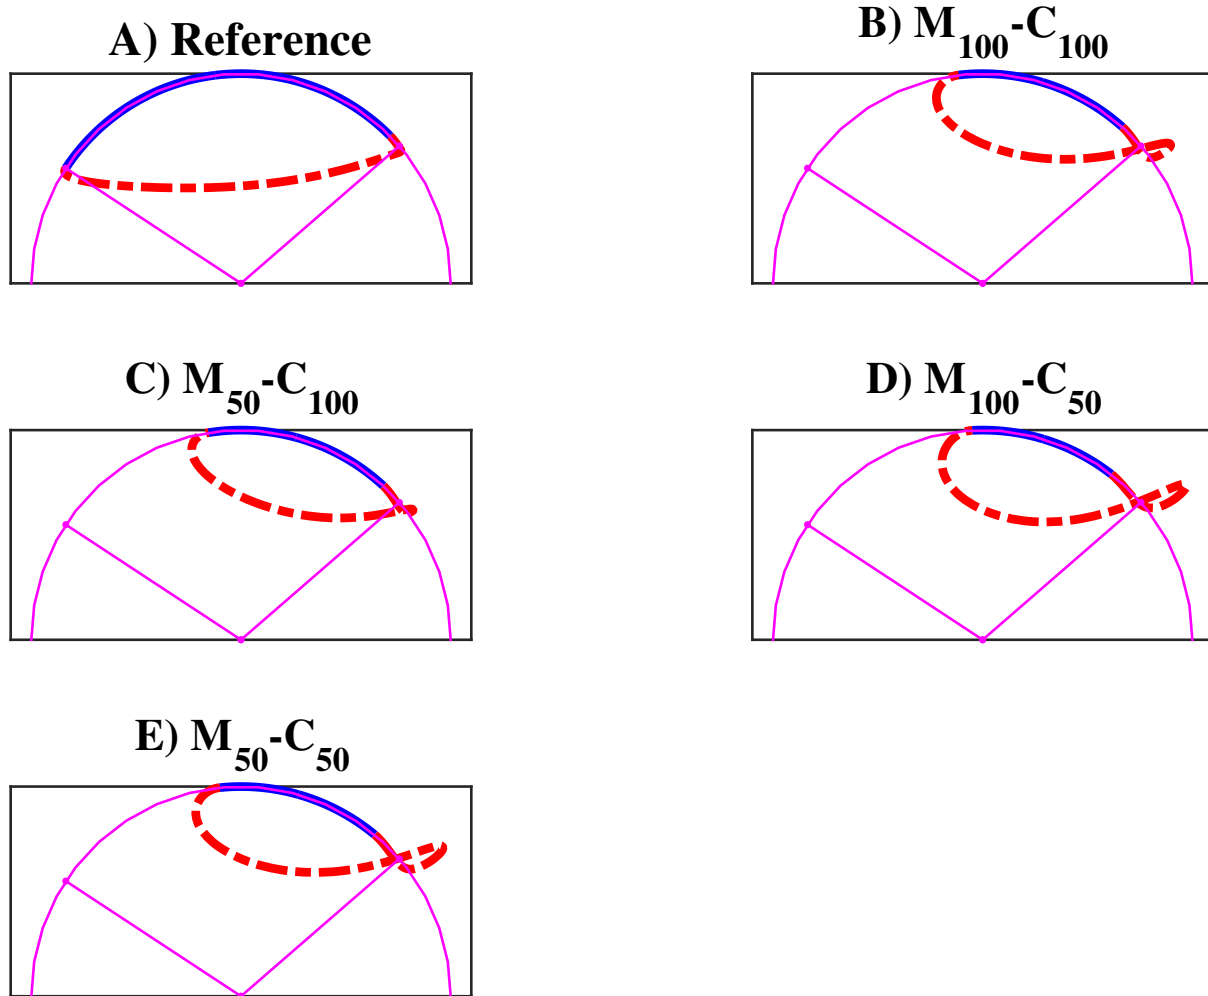

**Figure S5.** Predicted hand patterns for the reference unassisted condition (Reference) (**A**), for the assisted locomotion with 100% of reference model parameters  $M_i$  and  $C_i$  ( $M_{100} - C_{100}$ ) (**B**), reduction of 50% in  $M_i$  ( $M_{50} - C_{100}$ ) (**C**), reduction of 50% in  $C_i$  ( $M_{100} - C_{50}$ ) (**D**), and reduction of 50% in  $M_i$  and  $C_i$  ( $M_{50} - C_{50}$ ) (**E**) along a complete cycle for *steady state* locomotion on a  $3^\circ$  ramp at an average speed of 0.9 m/s.

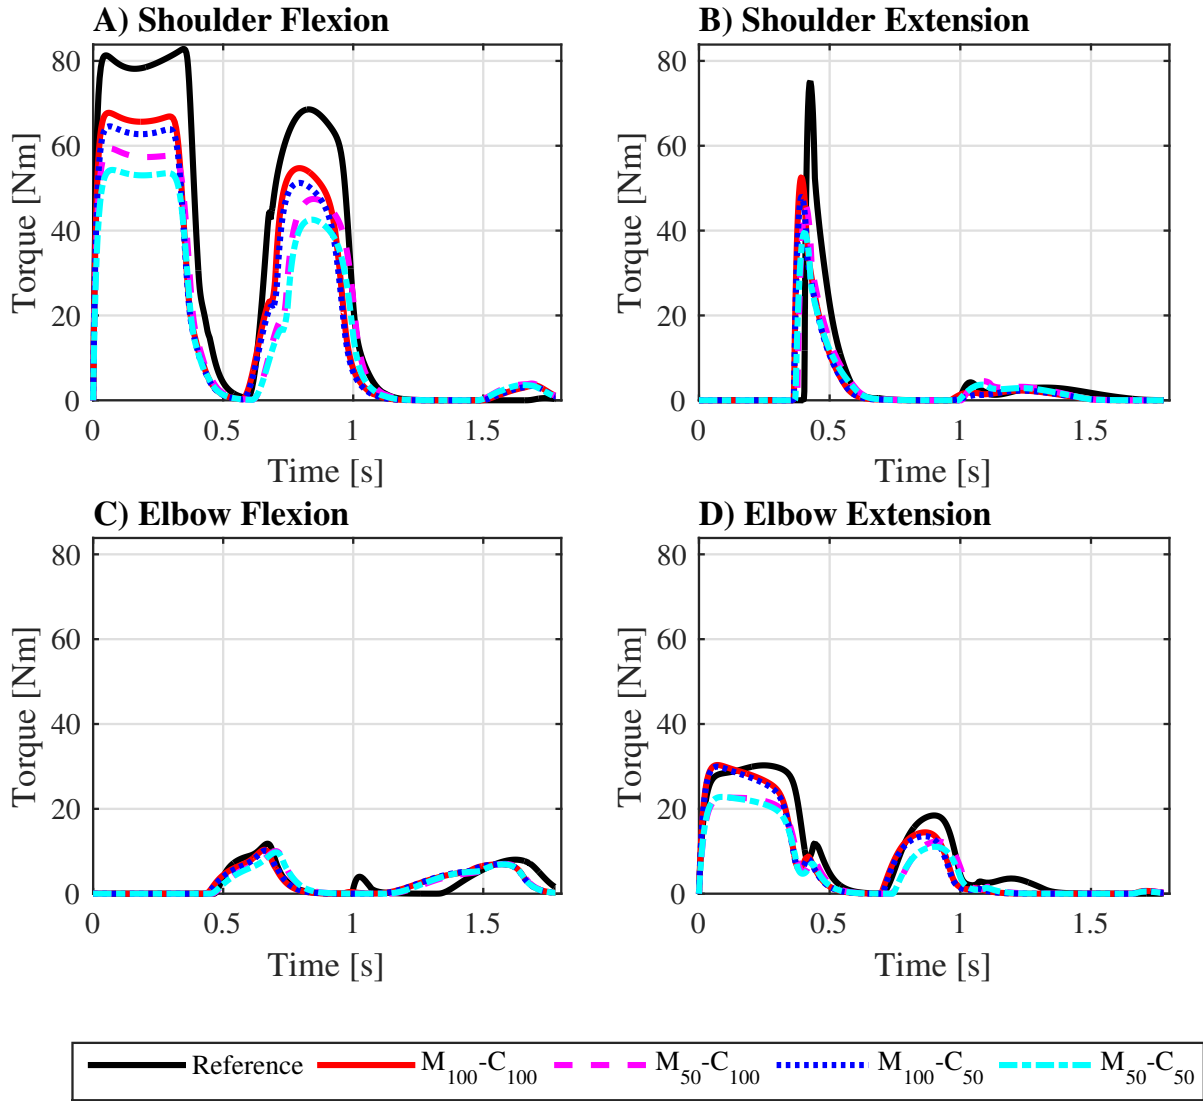

**Figure S6.** Predicted bilateral shoulder flexion (A), shoulder extension (B), elbow flexion (C) and elbow extension (D) torque profiles along the sequence of phases propulsion-recovery-propulsion-recovery-propulsion in the *startup* locomotion on a  $3^\circ$  ramp at an average speed of 0.9 m/s for the reference unassisted condition (Reference), and for the assisted locomotion with 100% of reference model parameters  $M_i$  and  $C_i$  ( $M_{100} - C_{100}$ ), reduction of 50% in  $M_i$  ( $M_{50} - C_{100}$ ), reduction of 50% in  $C_i$  ( $M_{100} - C_{50}$ ), and reduction of 50% in  $M_i$  and  $C_i$  ( $M_{50} - C_{50}$ ).

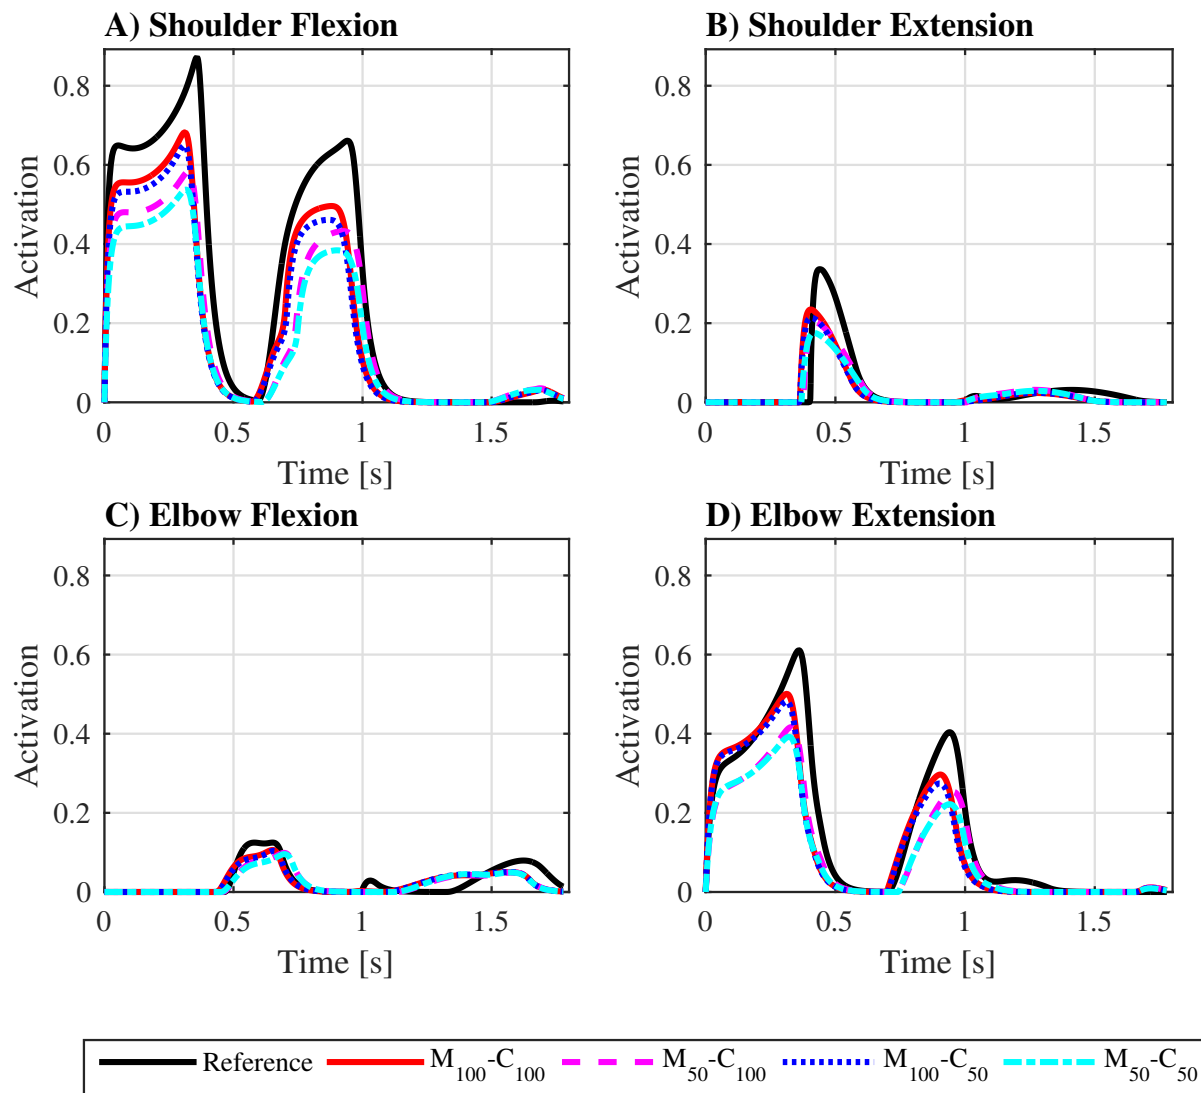

**Figure S7.** Predicted shoulder flexion (A), shoulder extension (B), elbow flexion (C) and elbow extension (D) activation profiles along the sequence of phases propulsion-recovery-propulsion-recovery-propulsion in the *startup* locomotion on a  $3^\circ$  ramp at an average speed of 0.9 m/s for the reference unassisted condition (Reference), and for the assisted locomotion with 100% of reference model parameters  $M_i$  and  $C_i$  ( $M_{100}-C_{100}$ ), reduction of 50% in  $M_i$  ( $M_{50}-C_{100}$ ), reduction of 50% in  $C_i$  ( $M_{100}-C_{50}$ ), and reduction of 50% in  $M_i$  and  $C_i$  ( $M_{50}-C_{50}$ ).

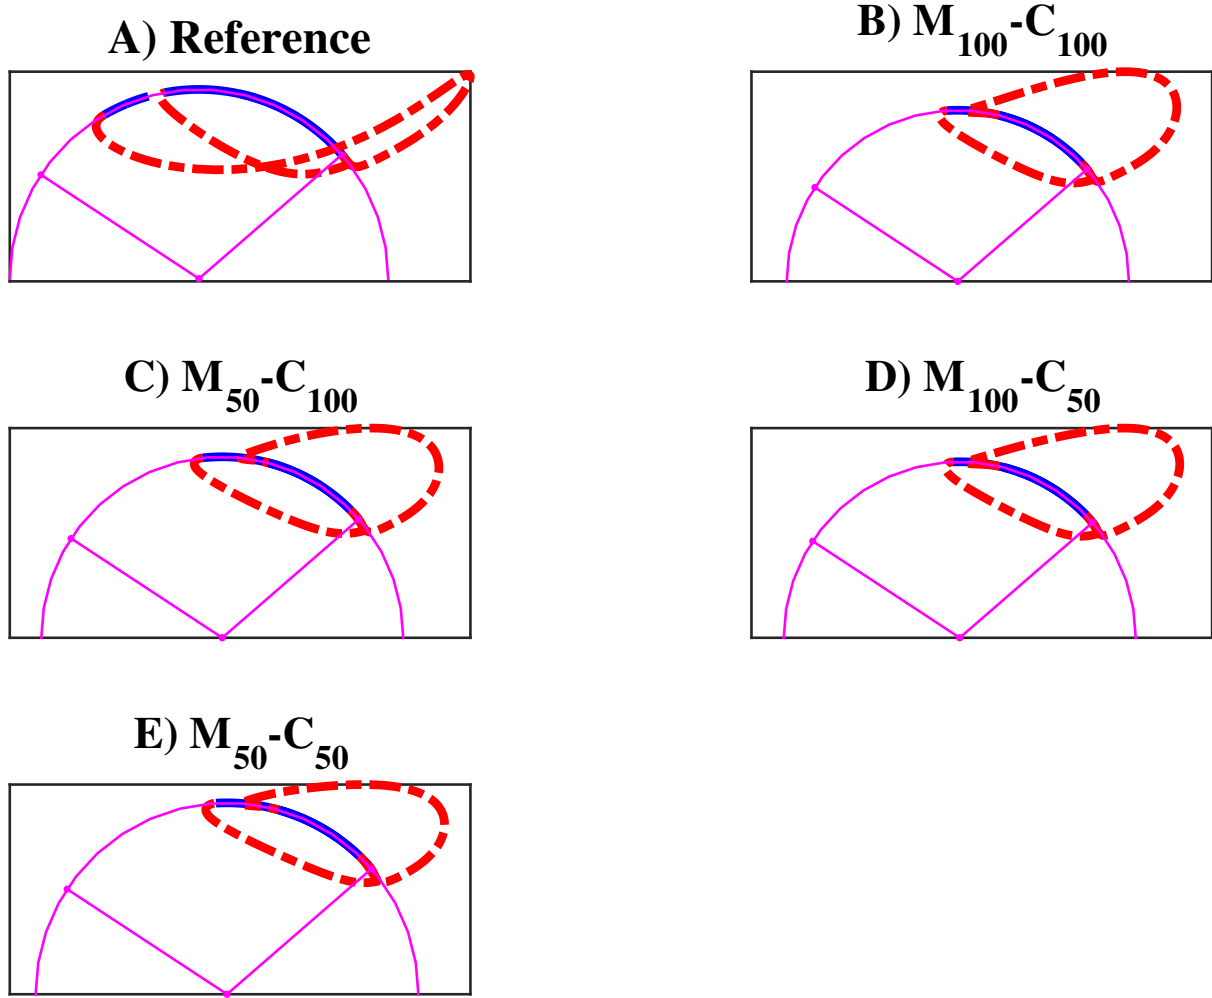

**Figure S8.** Predicted hand patterns for the reference unassisted condition (Reference) (A), for the assisted locomotion with 100% of reference model parameters  $M_i$  and  $C_i$  ( $M_{100} - C_{100}$ ) (B), reduction of 50% in  $M_i$  ( $M_{50} - C_{100}$ ) (C) and reduction of 50% in  $C_i$  ( $M_{100} - C_{50}$ ) (D), and reduction of 50% in  $M_i$  and  $C_i$  ( $M_{50} - C_{50}$ ) (E) along the sequence of phases propulsion-recovery-propulsion-recovery-propulsion in the *startup* locomotion on a  $3^\circ$  ramp at an average speed of 0.9 m/s.



## 2 REPOSITORIES

The function relating joint torques with muscle activations, containing force-length, force-velocity relationships and passive joint torques based on Brown (2018), is made available in [https://github.com/Vinicius-Ishimoto/Framework-for-Wheelchair-OC-Simulations/blob/main/Main%20Functions/muscle\\_torque\\_generators.m](https://github.com/Vinicius-Ishimoto/Framework-for-Wheelchair-OC-Simulations/blob/main/Main%20Functions/muscle_torque_generators.m).

The results of this study are made available in <https://github.com/Vinicius-Ishimoto/Framework-for-Wheelchair-OC-Simulations/tree/main/Results>, which is a MATLAB structure with all the data related to the person, wheelchair and the predicted states and controls for all the simulations. Please, follow the README instruction to access the data.
